# Supplementary material for: Identification of Withania somnifera-Silybum marianum-Trigonella foenum-graecum Formulation as a Nutritional Supplement to Contrast Muscle Atrophy and Sarcopenia
Source: PubMed Central journal article supplement (PMC7824275; doi:10.3390/nu13010049), 2020-12-26
Supplement: nutrients-13-00049-s001.pdf [file nutrients-13-00049-s001.pdf]

## Supplemental Information

**Table S1.**

| N  | Vernacular name    | Scientific name                           | Family                     | Used plant organ     | Origin    | Voucher number |
|----|--------------------|-------------------------------------------|----------------------------|----------------------|-----------|----------------|
| 1  | COMMON FUMITORY    | <i>Fumaria officinalis L.</i>             | Papaveraceae               | flowered top         | Macedonia | BIOF26733T     |
| 2  | OLIVE              | <i>Olea europaea L.</i>                   | Oleaceae                   | leaves               | Italy     | BIOF42911T     |
| 3  | BLACKCURRANT       | <i>Ribes nigrum L.</i>                    | Grossulariaceae            | leaves               | Italy     | BIOF52511T     |
| 4  | SAGE               | <i>Salvia officinalis L.</i>              | Lamiaceae                  | leaves               | Italy     | BIOF56111T     |
| 5  | ELDERBERRY         | <i>Sambucus nigra L.</i>                  | Adoxaceae                  | flowers              | Bulgaria  | BIOF56322I     |
| 6  | BOLDO              | <i>Peumus boldus Molina</i>               | Monimiaceae                | leaves               | Chile     | BIOU08511T     |
| 7  | CARDUS MARIANUS    | <i>Silybum marianum Gaert.</i>            | Asteraceae                 | fruits               | Austria   | BIOU12155I     |
| 8  | COMMON CHICORY     | <i>Cichorium intybus L.</i>               | Asteraceae                 | root                 | Italy     | BIOU15344C     |
| 9  | ROSELLE            | <i>Hibiscus sabdariffa L.</i>             | Malvaceae                  | flowers              | Egypt     | BIOU31922T     |
| 10 | COMMON MALLOW      | <i>Malva sylvestris L.</i>                | Malvaceae                  | leaves               | Italy     | BIOU37311T     |
| 11 | MACA               | <i>Lepidium meyenii L.</i>                | Brassicaceae               | powder root          | Peru      | BIOZ37044P     |
| 12 | ASIAN GINSENG      | <i>Panax ginseng Meyer</i>                | Araliaceae                 | root                 | China     | PC29144T       |
| 13 | GARDEN ANGELICA    | <i>Angelica archangelica L.</i>           | Apiaceae                   | root                 | China     | PFU03844C      |
| 14 | BITTER ORANGE      | <i>Citrus aurantium L. var. dulcis L.</i> | Rutaceae                   | flowers              | Iran      | PFU04922I      |
| 15 | BITTER ORANGE      | <i>Citrus aurantium L. var. dulcis L.</i> | Rutaceae                   | zests                | Albania   | PFU04967T      |
| 16 | CHAMOMILE          | <i>Chamomilla recutita Rausch.</i>        | Asteraceae o<br>Compositae | flowers              | Italy     | PFU10522I      |
| 17 | CHINESE PARSLEY    | <i>Coriandrum sativum L.</i>              | Apiaceae                   | fruits               | Italy     | PFU17955I      |
| 18 | WILLOWHERBS        | <i>Epilobium angustifolium L.</i>         | Onagraceae                 | summit               | Serbia    | PFU21933T      |
| 19 | HYSSOP             | <i>Hyssopus officinalis L.</i>            | Lamiaceae                  | flowers and leaves   | Italy     | PFU31322I      |
| 20 | LAVENDER           | <i>Lavandula angustifolia Miller</i>      | Lamiaceae                  | flowers              | France    | PFU32722I      |
| 21 | COMMON POPPY       | <i>Papaver rhoeas L.</i>                  | Papaveraceae               | petals               | Albania   | PFU44708T      |
| 22 | BROADLEAF PLANTAIN | <i>Plantago major L.</i>                  | Plantaginaceae             | leaves               | Poland    | PFU46711T      |
| 23 | CHINESE RHUBARB    | <i>Rheum officinale Baill.</i>            | Polygonaceae               | rhizomes             | China     | PFU51799C      |
| 24 | DOG ROSE           | <i>Rosa canina L.</i>                     | Rosaceae                   | cinorrodes/<br>seeds | Hungary   | PFU53310I      |

|    |                                   |                                                  |                            |                       |                    |           |
|----|-----------------------------------|--------------------------------------------------|----------------------------|-----------------------|--------------------|-----------|
| 25 | RUSTYBACK                         | <i>Ceterach officinarum</i><br>DC.               | Aspleniaceae               | aerial parts          | Italy              | PFU59533T |
| 26 | COMMON THYME                      | <i>Thymus vulgaris</i> L.                        | Lamiaceae                  | leaves                | Turkey             | PFU62311T |
| 27 | KINNIKINNICK                      | <i>Arctostaphylos</i><br><i>uva-ursi</i> Spreng. | Ericaceae                  | leaves                | Russia             | PFU63311T |
| 28 | BLACKSAMSON<br>ECHINACEA          | <i>Echinacea</i><br><i>angustifolia</i> DC.      | Asteraceae                 | root                  | Italy              | PFZ20544C |
| 29 | OAT                               | <i>Avena sativa</i> L.                           | Poaceae                    | aerial parts          | Hungary            | PS06309T  |
| 30 | CREAT                             | <i>Andrographis</i><br><i>paniculata</i> Nees    | Acanthaceae                | whole plant           | India              | PS16409T  |
| 31 | CACAO TREE                        | <i>Theobroma cacao</i>                           | Malvaceae                  | beans                 | Peru               | PS18677I  |
| 32 | WILD YAM                          | <i>Dioscorea villosa</i>                         | Dioscoreaceae              | root                  |                    | PS20044P  |
| 33 | COMMON HOP                        | <i>Humulus lupulus</i> L.                        | Cannabaceae                | flowers               | China              | PS36722I  |
| 34 | CHASTE TREE                       | <i>Vitex agnus castus</i> L.                     | Verbenaceae o<br>Lamiaceae | fruits                | Morocco            | PU01355I  |
| 35 | BITTER ALOE                       | <i>Aloe ferox</i> Miller                         | Xanthorrhoeace<br>ae       | juice                 | Porth<br>Elisabeth | PU02561P  |
| 36 | PINEAPPLE                         | <i>Ananas sativus</i> L.                         | Bromeliaceae               | stem                  | China              | PU03555T  |
| 37 | FEMALE<br>GINSENG                 | <i>Angelica sinesi</i> Diels                     | Apiaceae                   | root                  | Poland             | PU04044C  |
| 38 | GRAPPLE PLANT                     | <i>Harpagophytum</i><br><i>procumbens</i> DC.    | Pedaliaceae                | root                  | Namibia            | PU05544C  |
| 39 | MILKVETCH                         | <i>Astragalus</i><br><i>membranaceus</i> Fisch.  | Fabaceae/Legu<br>minosae   | root                  | China              | PU06244C  |
| 40 | GREATER<br>BURDOCK                | <i>Arctium lappa</i> L.                          | Asteraceae                 | root                  | Poland             | PU06744C  |
| 41 | COMMON<br>BARBERRY                | <i>Berberis vulgaris</i> L.                      | Berberidaceae              | bark                  | India              | PU07188T  |
| 42 | HAWTHORN                          | <i>Crataegus oxyacantha</i><br>L.                | Rosaceae                   | flowers and<br>leaves | Poland             | PU08112T  |
| 43 | SHEPHERD'S<br>BURSE               | <i>Capsella bursa-<br/>pastoris</i> Medicus      | Brassicaceae               | flowered tops         | Albania            | PU08933T  |
| 44 | ROBUSTA<br>COFFEA                 | <i>Coffea robusta</i> L.                         | Rubiaceae                  | grains                | India              | PU09603C  |
| 45 | CEYLON<br>CINNAMON                | <i>Cinnamomum</i><br><i>zeylanicum</i> Nees      | Lauraceae                  | bark                  | Ceylon             | PU11188T  |
| 46 | FRENCH<br>ARTICHOKE               | <i>Cynarascolymus</i><br><i>Hayek</i>            | Asteraceae                 | leaves                | Italy              | PU11511T  |
| 47 | CENTELLA,<br>ASIATIC<br>PENNYWORT | <i>Hydrocotyle asiatica</i><br>L.                | Apiaceae                   | aerial parts          | Madagascar         | PU14111T  |
| 48 | CHINCHONA,<br>QUINA QUINA         | <i>Cinchona succirubra</i><br>Pav.               | Rubiaceae                  | bark                  | Indonesia          | PU15188C  |
| 49 | TURMERIC                          | <i>Curcuma longa</i> L.                          | Zingiberaceae              | rhizomes              | India              | PU19344C  |
| 50 | PALE PURPLE<br>CONEFLOWER         | <i>Echinacea pallida</i><br>Britton              | Asteraceae                 | root                  | Italy              | PU20444C  |
| 51 | EASTERN<br>PURPLE<br>CONEFLOWER   | <i>Echinacea purpurea</i><br>Moench.             | Asteraceae                 | root                  | Poland             | PU20644C  |

|    |                          |                                          |               |               |              |          |
|----|--------------------------|------------------------------------------|---------------|---------------|--------------|----------|
| 52 | DEVIL'S BUSH             | <i>Eleutherococcus senticosus Maxim.</i> | Araliaceae    | root          | China        | PU21144C |
| 53 | ITALIAN STRAWFLOWER      | <i>Helicrysum italicum G. Don</i>        | Asteraceae    | flowered tops | Italy        | PU21333T |
| 54 | HOARY WILLOWHERB         | <i>Epilobium parviflorum Schreb.</i>     | Onagraceae    | flowered tops | Albania      | PU21833T |
| 55 | COMMON HORSETAIL         | <i>Equisetum arvense L.</i>              | Equisetaceae  | stems         | Poland       | PU22001T |
| 56 | FENUGREEK                | <i>Trigonella foenum-graecum L.</i>      | Leguminosae   | seeds         | India        | PU25377I |
| 57 | FENNEL                   | <i>Foeniculum vulgare Miller</i>         | Apiaceae      | fruits        | India        | PU25677I |
| 58 | GINKGO                   | <i>Ginkgo biloba L.</i>                  | Ginkgoaceae   | leaves        | Italy        | PU28911T |
| 59 | BERMUDA GRASS            | <i>Cynodon dactylon L.</i>               | Poaceae       | rhizomes      | China        | PU29499C |
| 60 | COMMON COUCH             | <i>Agropyrum repens Beauv.</i>           | Poaceae       | rhizomes      | Serbia       | PU29999C |
| 61 | GUARANA'                 | <i>Paullini asorbilis Mart.</i>          | Sapindaceae   | seeds         | Brasil       | PU30577I |
| 62 | FRANKINCENSE             | <i>Boswellia carterii Birdwood</i>       | Burseraceae   | grains        | Ethiopia     | PU30703I |
| 63 | PERFORATE ST JOHN'S-WORT | <i>Hypericum perforatum L.</i>           | Clusiaceae    | flowered tops | Serbia       | PU31233T |
| 64 | LIQUORICE                | <i>Glycyrrhiza glabra L.</i>             | Fabaceae      | root          | Egypt        | PU34344C |
| 65 | YERBA MATE               | <i>Ilex paraguariensis St. Hil.</i>      | Aquifoliaceae | flowered tops | Brasil       | PU38533T |
| 66 | LEMON BALM               | <i>Melissa officinalis L.</i>            | Lamiaceae     | leaves        | Italy        | PU38911T |
| 67 | PEPPERMINT               | <i>Mentha piperita L.</i>                | Lamiaceae     | leaves        | Serbia       | PU39511T |
| 68 | COMMON BILBERRY          | <i>Vaccinium myrtillus L</i>             | Ericaceae     | leaves        | Hungary      | PU40511T |
| 69 | MORINGA                  | <i>Moringa oleifera Lamk.</i>            | Moringaceae   | leaves        | Burkina Faso | PU40711T |
| 70 | MUIRAPUAMA               | <i>Ptychopetalum olacoides Bentham</i>   | Olacaceae     | wood          | Brasil       | PU41104T |
| 71 | JAVA TEA                 | <i>Orthosiphon stamineus Benth.</i>      | Lamiaceae     | leaves        | Indonesia    | PU43711T |
| 72 | COMMON NETTLE            | <i>Urtica dioica L.</i>                  | Urticaceae    | leaves        | Italy        | PU43911T |
| 73 | BLACK PEPPER             | <i>Piper nigrum L.</i>                   | Piperaceae    | grains        | Brasil       | PU46303I |
| 74 | CAYENNE PEPPER           | <i>Capsicum annuum L.</i>                | Solanaceae    | fruits        | Uganda       | PU46555I |
| 75 | SCOTS PINE               | <i>Pinus sylvestris L.</i>               | Pinaceae      | gems          | Albania      | PU47302I |
| 76 | POLLEN mix flower        |                                          |               |               | Spain        | PU48903I |
| 77 | GOLDEN ROOT              | <i>Rhodiola rosea L.</i>                 | Crassulaceae  | root          | China        | PU53244T |
| 78 | RED RASPBERRY            | <i>Rubus idaeus L.</i>                   | Rosaceae      | leaves        | Albania      | PU54711T |
| 79 | CATBRIERS                | <i>Smilax medica Cham. et Sch.</i>       | Smilacaceae   | root          | Mexico       | PU55944C |

|     |                    |                                               |                  |                      |              |           |
|-----|--------------------|-----------------------------------------------|------------------|----------------------|--------------|-----------|
| 80  | MOUNTAIN SAVORY    | <i>Satureja montana L.</i>                    | Lamiaceae        | leaves               | Albania      | PU56911I  |
| 81  | ALEXANDRIAN SENNA  | <i>Cassia angustifolia Vahl.</i>              | Leguminosae      | leaves               | India        | PU58311T  |
| 82  | SAW PALMETTO       | <i>Serenoa serrulata Hook.</i>                | Arecaceae        | fruits               | USA          | PU58755T  |
| 83  | PINK LAPACHO       | <i>Tabebuia avellane daelorentz ex griseb</i> | Bignoniaceae     | bark                 | Paraguay     | PU60244C  |
| 84  | TEA PLANT          | <i>Camellia sinesi Kuntze</i>                 | Theaceae         | leaves               | China        | PU61111I  |
| 85  | LARGELEAF LINDEN   | <i>Tilia platyphyllos Scop.</i>               | Malvaceae        | flowers and bracts   | Serbia       | PU61533T  |
| 86  | BOGBEAN            | <i>Menyanthes trifoliata L.</i>               | Menyanthaceae    | leaves               | North Europe | PU62711T  |
| 87  | RED CLOVER         | <i>Trifolium pratense L.</i>                  | Leguminosae      | fruits               | Albania      | PU62822I  |
| 88  | CAT'S CLAW         | <i>Uncaria tomentosa DC.</i>                  | Rubiaceae        | bark                 | Peru         | PU63288T  |
| 89  | VALERIAN           | <i>Valeriana officinalis L.</i>               | Caprifoliaceae   | root                 | Poland       | PU63744C  |
| 90  | GREAT MULLEIN      | <i>Verbascum thapsus L.</i>                   | Scrophulariaceae | flowers              | Hungary      | PU64122I  |
| 91  | EUROPEAN MISTLETOE | <i>Viscum album L.</i>                        | Santalaceae      | leaves and twigs     | Hungary      | PU65711I  |
| 92  | COMMON GRAPE VINE  | <i>Vitis vinifera L.</i>                      | Vitaceae         | leaves               | Tunisia      | PU66711T  |
| 93  | INDIAN GINSENG     | <i>Withania somnifera Dunal</i>               | Solanaceae       | root                 | India        | PU67044C  |
| 94  | GINGER             | <i>Zingiber officinale Roscoe</i>             | Zingiberaceae    | rhizomes             | Nigeria      | PU67999T  |
| 95  | PUMPKINS           | <i>Cucurbita pepo L.</i>                      | Cucurbitaceae    | seeds                | China        | PU68277I  |
| 96  | WOLF'S BANE        | <i>Arnica montana L.</i>                      | Asteraceae       | flowers              | Hungary      | PZ05222I  |
| 97  | DAMIANA            | <i>Turnera diffusa Willd</i>                  | Passifloraceae   | leaves               | Mexico       | PZ19711T  |
| 98  | TARRAGON           | <i>Artemisia dracunculus L.</i>               | Asteraceae       | leaves               | Poland       | PZ19911T  |
| 99  | MAGNOLIA VINE      | <i>Schisandra chinensis Turcz. Baill.</i>     | Schisandraceae   | fruits               | China        | PZ57455I  |
| 100 | CALIFORNIA POPPY   | <i>Eschscholzia californica Cham.</i>         | Papaveraceae     | whole flowered plant | Italy        | BIOD3744I |

**Table S1.** Plants tested in this study, including their vernacular and botanical names, family, organ/s used, and voucher number.

**Table S2.**

| Primary Antibody                                                    | Molecular weight (kDa) | Dilution | Source               |
|---------------------------------------------------------------------|------------------------|----------|----------------------|
| Mouse monoclonal anti-MyHC-II (MF20)                                | 220                    | 1:10000  | eBiosciences         |
| Mouse monoclonal anti-MyHC developmental (RNMY2/9D2)                | 220                    | 1:500    | Monosan              |
| Mouse monoclonal anti-MyoD (5.8A)                                   | 45                     | 1:500    | Santa Cruz Biotech   |
| Mouse monoclonal anti-Myogenin (F5D)                                | 34                     | 1:1000   | Santa Cruz Biotech   |
| Mouse monoclonal anti- $\alpha$ -Tubulin (DM1A)                     | 55                     | 1:2000   | Santa Cruz Biotech   |
| Rabbit monoclonal anti-phospho-Akt (Ser473) (D9E)                   | 60                     | 1:2000   | Cell Signaling Tech. |
| Rabbit monoclonal anti-phospho-NF-kB p65 (Ser536) (93H1)            | 65                     | 1:2000   | Cell Signaling Tech. |
| Rabbit monoclonal anti-phospho-p38 MAPK (Thr180/Tyr182) (D3F9) XP   | 43                     | 1:2000   | Cell Signaling Tech. |
| Rabbit polyclonal anti-phospho-p44/42 MAPK (Erk1/2) (Thr202/Tyr204) | 42/44                  | 1:2000   | Cell Signaling Tech. |
| Rabbit polyclonal anti-phospho-mTOR (Ser2448)                       | 289                    | 1:1000   | Cell Signaling Tech. |
| Rabbit polyclonal anti-Akt (Thr308) (D25E6)                         | 60                     | 1:2000   | Cell Signaling Tech. |
| Rabbit polyclonal anti-NF-kB (p65) (C-20)                           | 65                     | 1:2000   | Cell Signaling Tech. |
| Rabbit polyclonal anti-p38 MAPK                                     | 40                     | 1:1000   | Cell Signaling Tech. |
| Rabbit polyclonal anti-MAP Kinase (ERK-1, ERK-2)                    | 42/44                  | 1:10000  | Cell Signaling Tech. |
| Rabbit polyclonal anti-mTOR                                         | 289                    | 1:1000   | Cell Signaling Tech. |
| Goat anti-mouse IgG/IgM-HRP conjugated                              |                        |          | Sigma-Aldrich        |
| Goat anti-rabbit IgG-HRP conjugated                                 |                        |          | Sigma-Aldrich        |

**Table S2.** List of primary and secondary antibodies used in WB.**Table S3.**

| Gene          | Forward primer 5'-3' | Reverse primer 5'-3' |
|---------------|----------------------|----------------------|
| <i>Fbxo32</i> | GTCTTGGGAATGTACGACGC | GCGCTCCTTCGTA CTTCTT |
| <i>Gapdh</i>  | GCCTTCCGTGTTCTACCC   | CAGTGGGCCCTCAGATGC   |
| <i>Myh2</i>   | AAACAGAAGCAGGAGCGACC | CACCGGCAGCCATTTGTAAG |

**Table S3.** List of primers used in real-time PCR.

**Table S4**

|                                                      | Change in myotube diameter, % |                          | Change in myotube diameter, % |                          | Change in myotube diameter, % |
|------------------------------------------------------|-------------------------------|--------------------------|-------------------------------|--------------------------|-------------------------------|
| <b>TNF<math>\alpha</math>/IFN<math>\gamma</math></b> | <b>-41.3</b>                  | <b>Dex</b>               | <b>-23.9</b>                  | <b>PBS</b>               | <b>-46.4</b>                  |
| <i>W. somnifera</i>                                  | +51.3                         | <i>P. ginseng.</i>       | +20.8                         | <i>A. repens</i>         | -13.4                         |
| <i>P. ginseng</i>                                    | +16.3                         | <i>W. somnifera</i>      | +20.3                         | <i>P. boldus</i>         | -19.3                         |
| <i>S. marianum</i>                                   | +7.8                          | <i>A. repens</i>         | +5.9                          | <i>W. somnifera.</i>     | -21.6                         |
| <i>R. officinale</i>                                 | +6.1                          | <i>S. marianum</i>       | +3.1                          | <i>T. foenum-graecum</i> | -22.5                         |
| <i>P. boldus</i>                                     | -2.1                          | <i>S.chinensis</i>       | -8.1                          | <i>P. ginseng</i>        | -24.3                         |
| <i>G. biloba</i>                                     | -6.4                          | <i>T. foenum-graecum</i> | -8.5                          | <i>U. dioica</i>         | -37.4                         |
| <i>S.chinensis</i>                                   | -6.8                          | <i>P. boldus</i>         | -14.3                         | <i>S. marianum</i>       | -46                           |
| <i>U. dioica</i>                                     | -9.9                          | <i>G. biloba</i>         | -17                           | <i>R. officinale</i>     | -48                           |
| <i>T. foenum-graecum</i>                             | -15.6                         | <i>R. officinale</i>     | -30                           | <i>S.chinensis</i>       | -48.4                         |
| <i>A.repens</i>                                      | -16.6                         | <i>U. dioica</i>         | -32                           | <i>G. biloba</i>         | -50.3                         |

**Table S4.** C2C12 myotubes were treated with TNF $\alpha$  (tumor necrosis factor  $\alpha$ )/IFN $\gamma$  (interferon  $\gamma$ ), Dex (dexamethasone) or PBS (phosphate buffered saline) in the absence or presence of the selected plant extracts for 48h (TNF $\alpha$ /IFN $\gamma$  and Dex) or 16h (PBS) and IF for myosin heavy chain (MyHC)-II was performed. Reported are the percentages of myotube diameter changes in comparison to untreated myotube.

**Supplementary Figure 1.** C2C12 myotubes were treated with one-hundred different plant extract (100  $\mu$ g/mL) for 48h. May-Grünwald/Giemsa staining was performed and total myotube area was measured by *Image J* software. The graph reports the percent changes in myotube area relative to untreated control.

**Supplementary Figure 2.** (A,B) C2C12 myotubes were treated with T (tumor necrosis factor  $\alpha$ , 20 ng/mL)/I (interferon  $\gamma$ , 100 U/mL) (T/I) in the absence or presence of each selected 96 plant extracts (100  $\mu$ g/mL) for 48h. May-Grünwald/Giemsa staining was performed and total myotube areas were measured by *Image J* software (A). The graph reports the percent changes in myotube area with respect to untreated control. Dotted line indicates the arbitrary cut off to select the extracts

able to impair T/I-dependent myotube area reduction up to 10% (A). Reported are representative images of the 17 extracts selected for further investigation. Bars, 500  $\mu\text{m}$  (B).

**Supplementary Figure 3.** C2C12 myotubes were untreated or treated with dexamethasone (Dex, 1  $\mu\text{M}$ ) for 48h (A) or starved with PBS (phosphate buffered saline) for 16h (B) in absence or presence of the selected 10 plant extracts. Immunofluorescence (IF) analysis for myosin heavy chain (MyHC)-II was performed and myotube diameters were measured by *Image J* software. Reported are representative images with average myotube diameters ( $\mu\text{m}$ ) $\pm$ SD (standard deviation). Bars, 100  $\mu\text{m}$ .

**Supplementary Figure 4.** Full  $^1\text{H}$  NMR (Nuclear Magnetic Resonance) spectra of the most active extracts, with highlighted extended regions on top of the figure; diagnosis signals of: 1=alanine, 2=quinic acid, 3=aspartate, 4=malic acid, 5=citric acid, 6=sucrose, 7= $\beta$ -glucose, 8= $\alpha$ -glucose, 9=caffeic acid, 10=shikim acid, 11=trigonelline.

**Supplementary Figure 5.** (A) C2C12 myotubes were treated with TNF $\alpha$  (tumor necrosis factor  $\alpha$ , 20 ng/mL)/IFN $\gamma$  (interferon  $\gamma$ , 100 U/mL) (T/I) in the absence or presence of ten selected plant extracts (100  $\mu\text{g}/\text{mL}$ ) for 48h and the expression of myosin heavy chain (MyHC)-II expression were analyzed by WB (western blotting). Reported are representative images. Reported are the relative densities with respect to tubulin. Statistical analysis was conducted using t-test \* $p < 0.05$ , \*\* $p < 0.01$  significantly different from untreated control. (B) C2C12 myotubes were treated with T/I in the absence or presence of the 20 different herbal formulations (100  $\mu\text{g}/\text{mL}$ ) for 48h. May-Grünwald/Giemsa staining was performed and total myotube area was measured by *Image J* software. The graph reports the percent changes in myotube area relative to untreated control. Five formulations were able to counteract the reduction of the myotube area induced by T/I. Bars, 500  $\mu\text{m}$ .

**Supplementary Figure 6.** C2C12 myotubes were treated with TNF $\alpha$  (tumor necrosis factor  $\alpha$ , 20 ng/mL)/IFN $\gamma$  (interferon  $\gamma$ , 100 U/mL) (T/I) (A,B) or dexamethasone (Dex, 1  $\mu\text{M}$ ) (C,D) in the absence or presence of WST (100  $\mu\text{g}/\text{mL}$ ). WB (western blotting) analysis was performed to verify p-ERKs (phospho-extracellular signal-regulated kinases), ERKs, p-p65 (phospho-NF- $\kappa\text{B}$  p65, nuclear factor kappa-light-chain-enhancer of activated B cells p65) and p65 levels after 6h, whereas p-mTOR (mammalian target of rapamycin), mTOR and MyoD (myoblast determination protein 1) expression were analyzed after 48h (A,C). Tubulin was used as protein loading control (A,C). Levels of *Myh2* (*Myosin heavy chain 2*) and *Fbxo32* (*muscle atrophy F-box protein*) were analyzed after 24h by real-time PCR. (E) Myotubes were treated with WST and analyzed after 48h by IF (immunofluorescence) for myosin heavy chain (MyHC)-II. Reported are representative images

(A,C,E). Reported are the relative densities with respect to tubulin or total form of phosphorylated protein (A,C). Results are means $\pm$ SD (standard deviation) (A-E). Statistical analysis was conducted using t-test \*p<0.05, \*\*p<0.01 significantly different from untreated control; #p<0.05 and ##p<0.01 significantly different from T/I (A,B,E) or Dex (C,D).



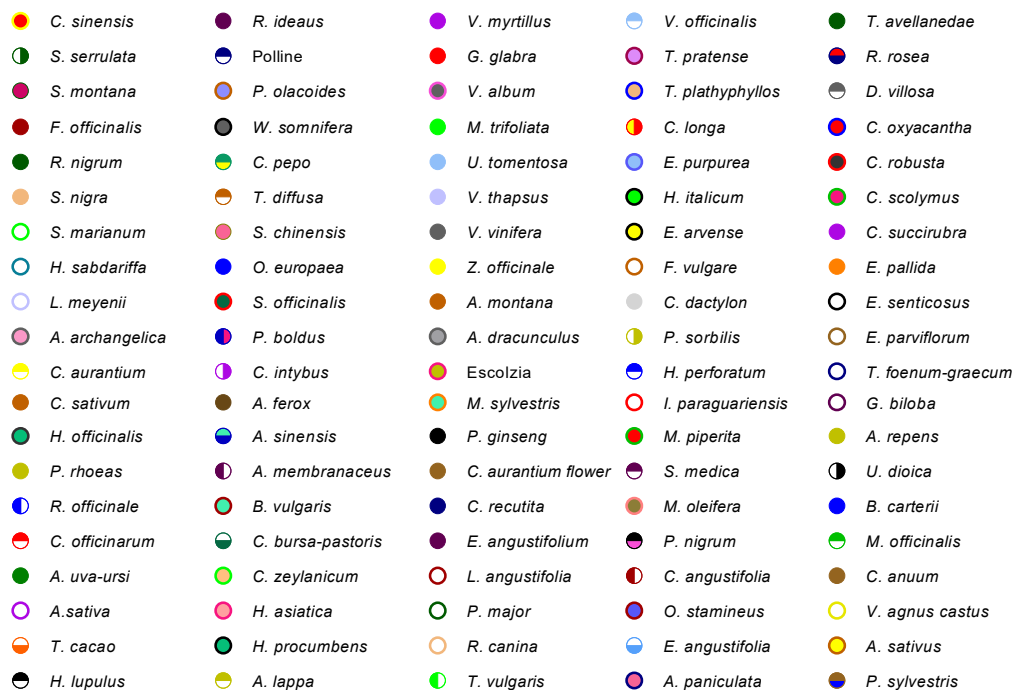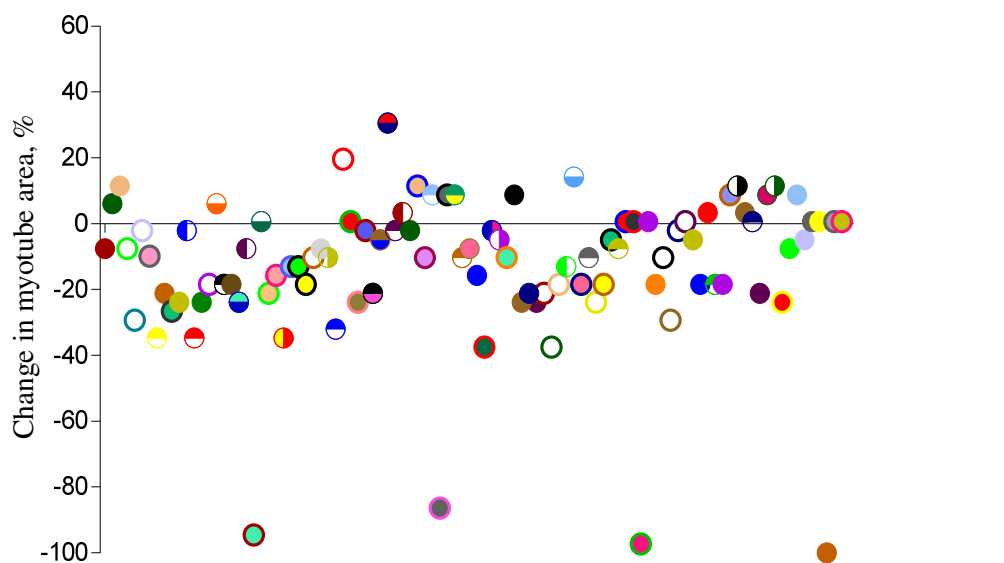

Supplementary Figure 1

**A**

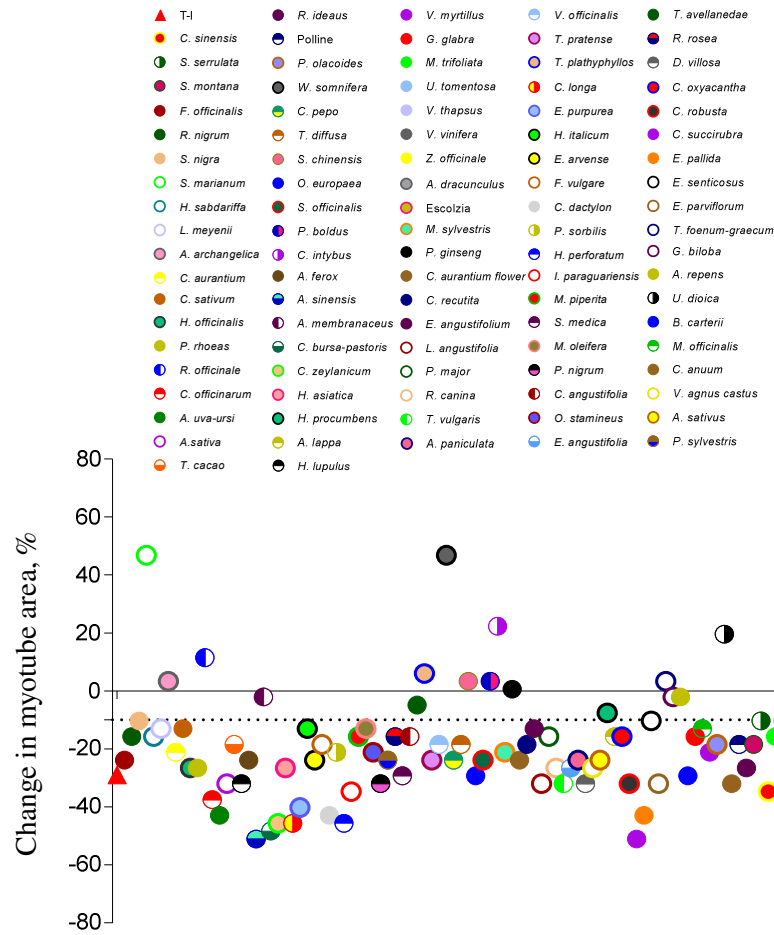

**B**

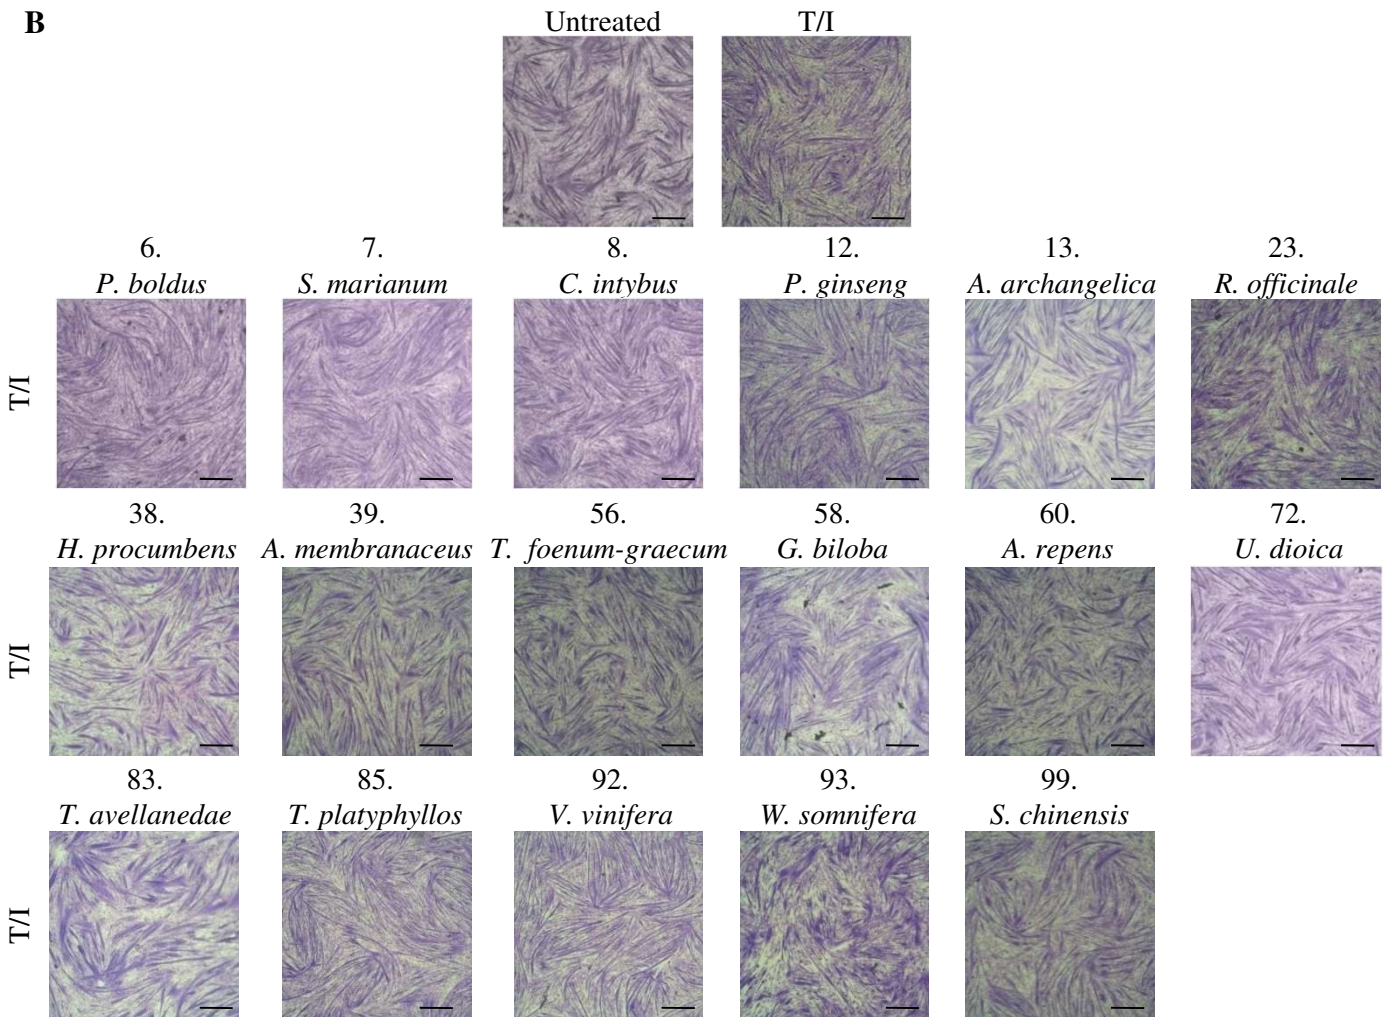

Supplementary Figure S2

**A**

IF, MyHC-II

Untreated

Dex

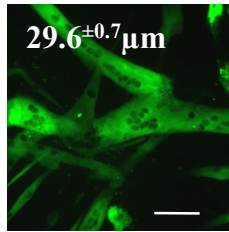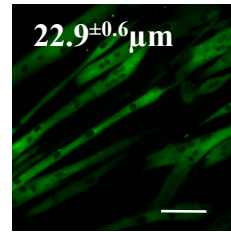

Dex

7.

12.

56.

60.

93.

99.

*S. marianum**P. ginseng**T. foenum-graecum**A. repens**W. somnifera**S. chinensis*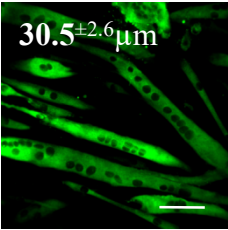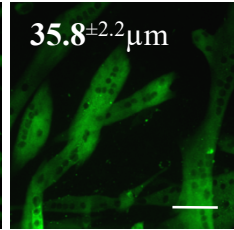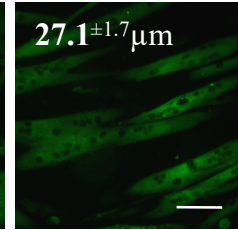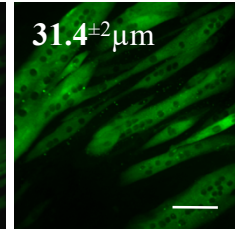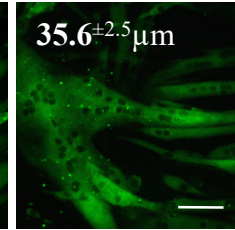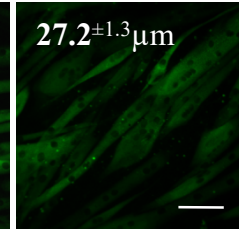**B**

IF, MyHC-II

Untreated

PBS

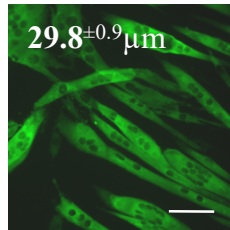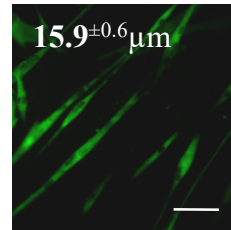

PBS

6.

12.

56.

60.

93.

*P. boldus**P. ginseng**T. foenum-graecum**A. repens**W. somnifera*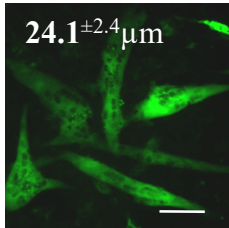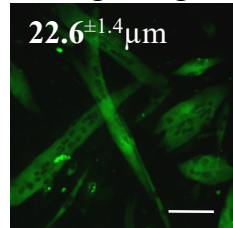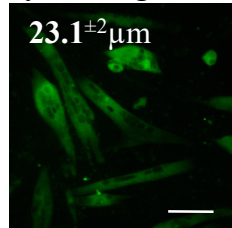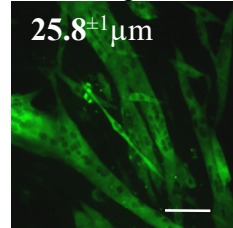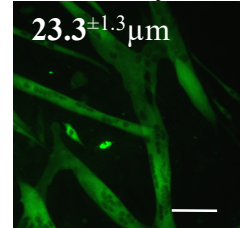

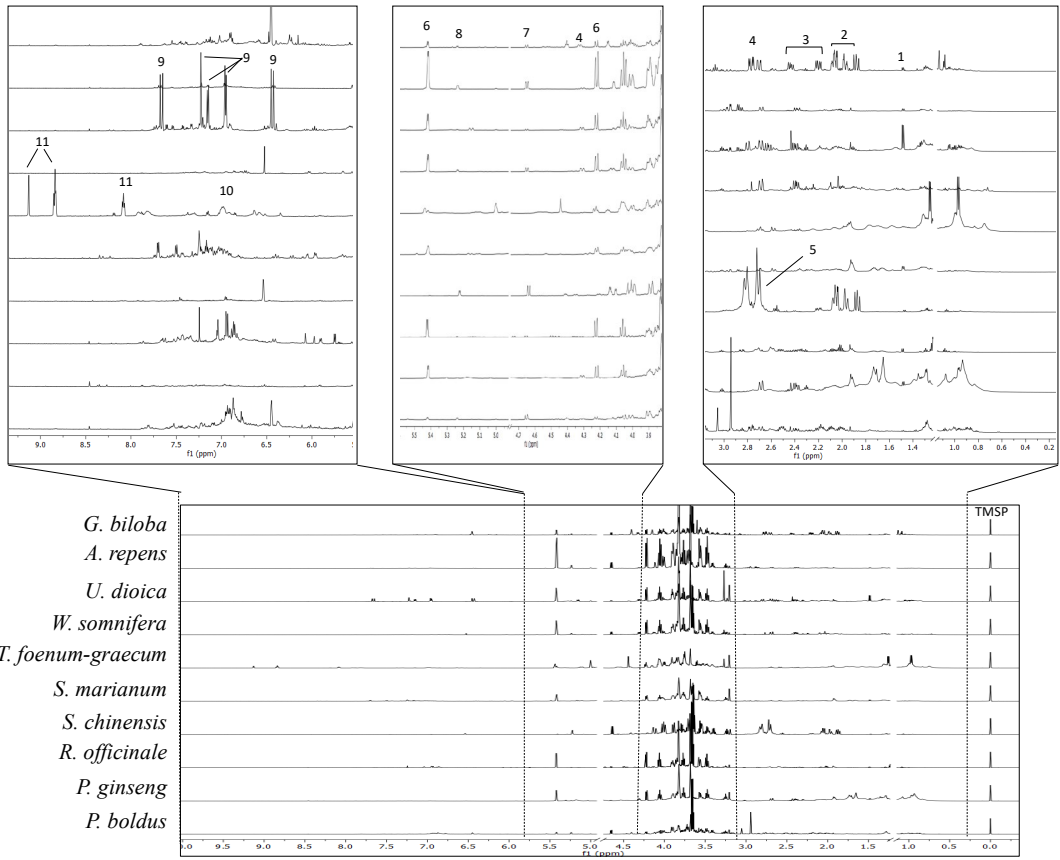

Supplementary Figure 4

**A**

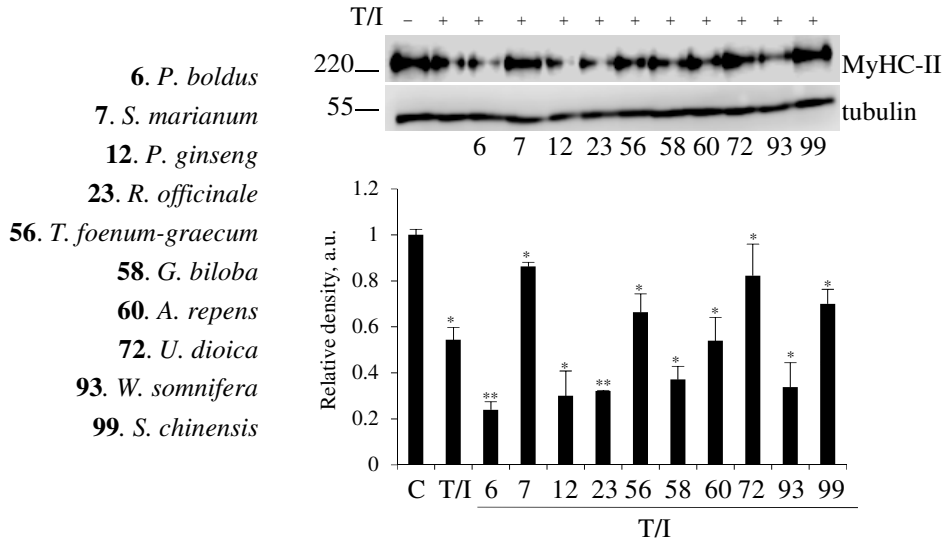

**B**

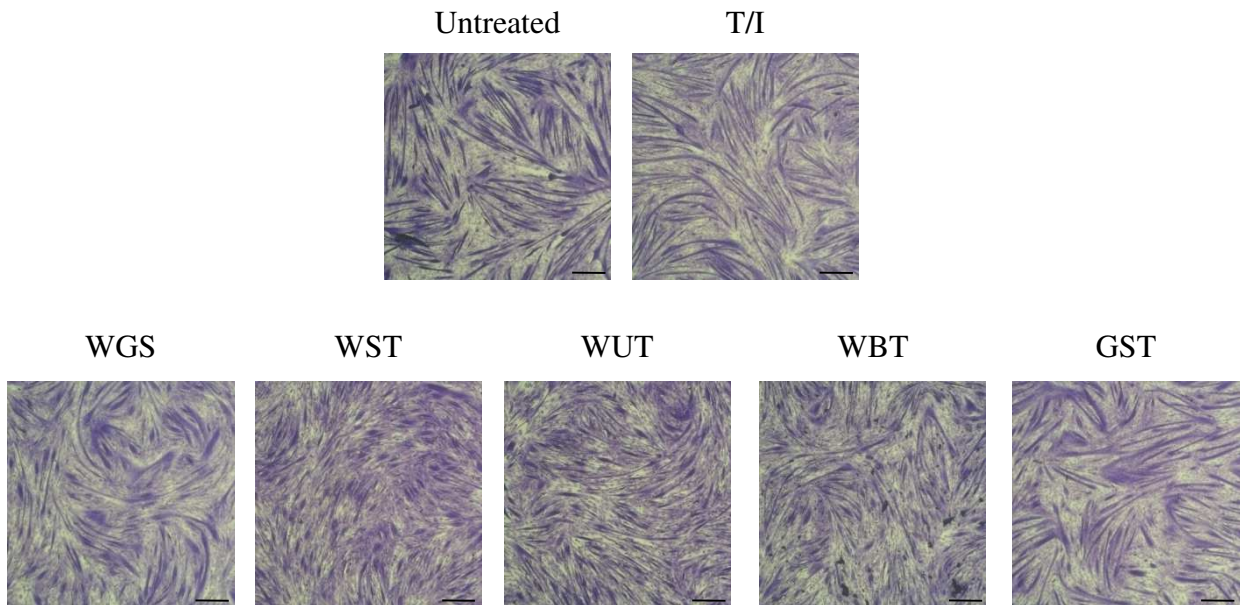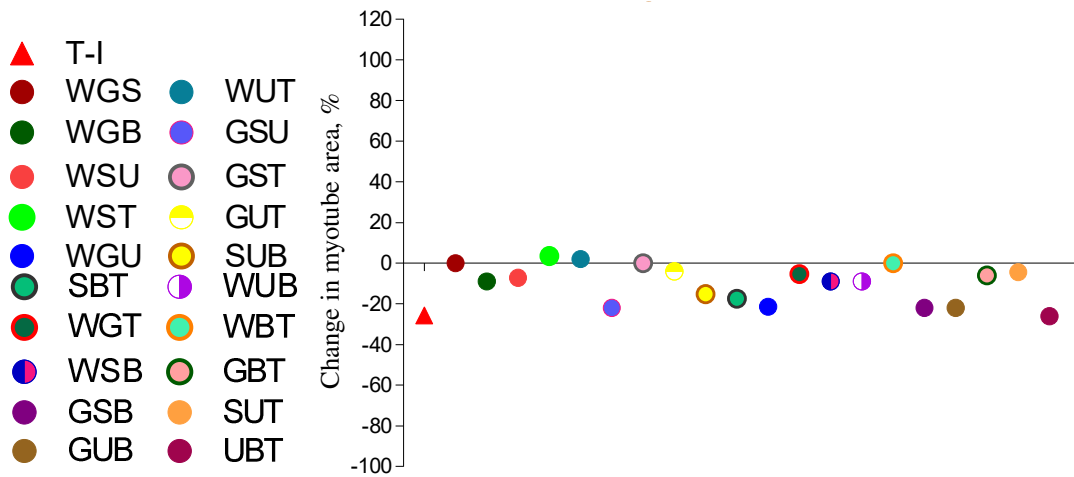

**Supplementary Figure 5**

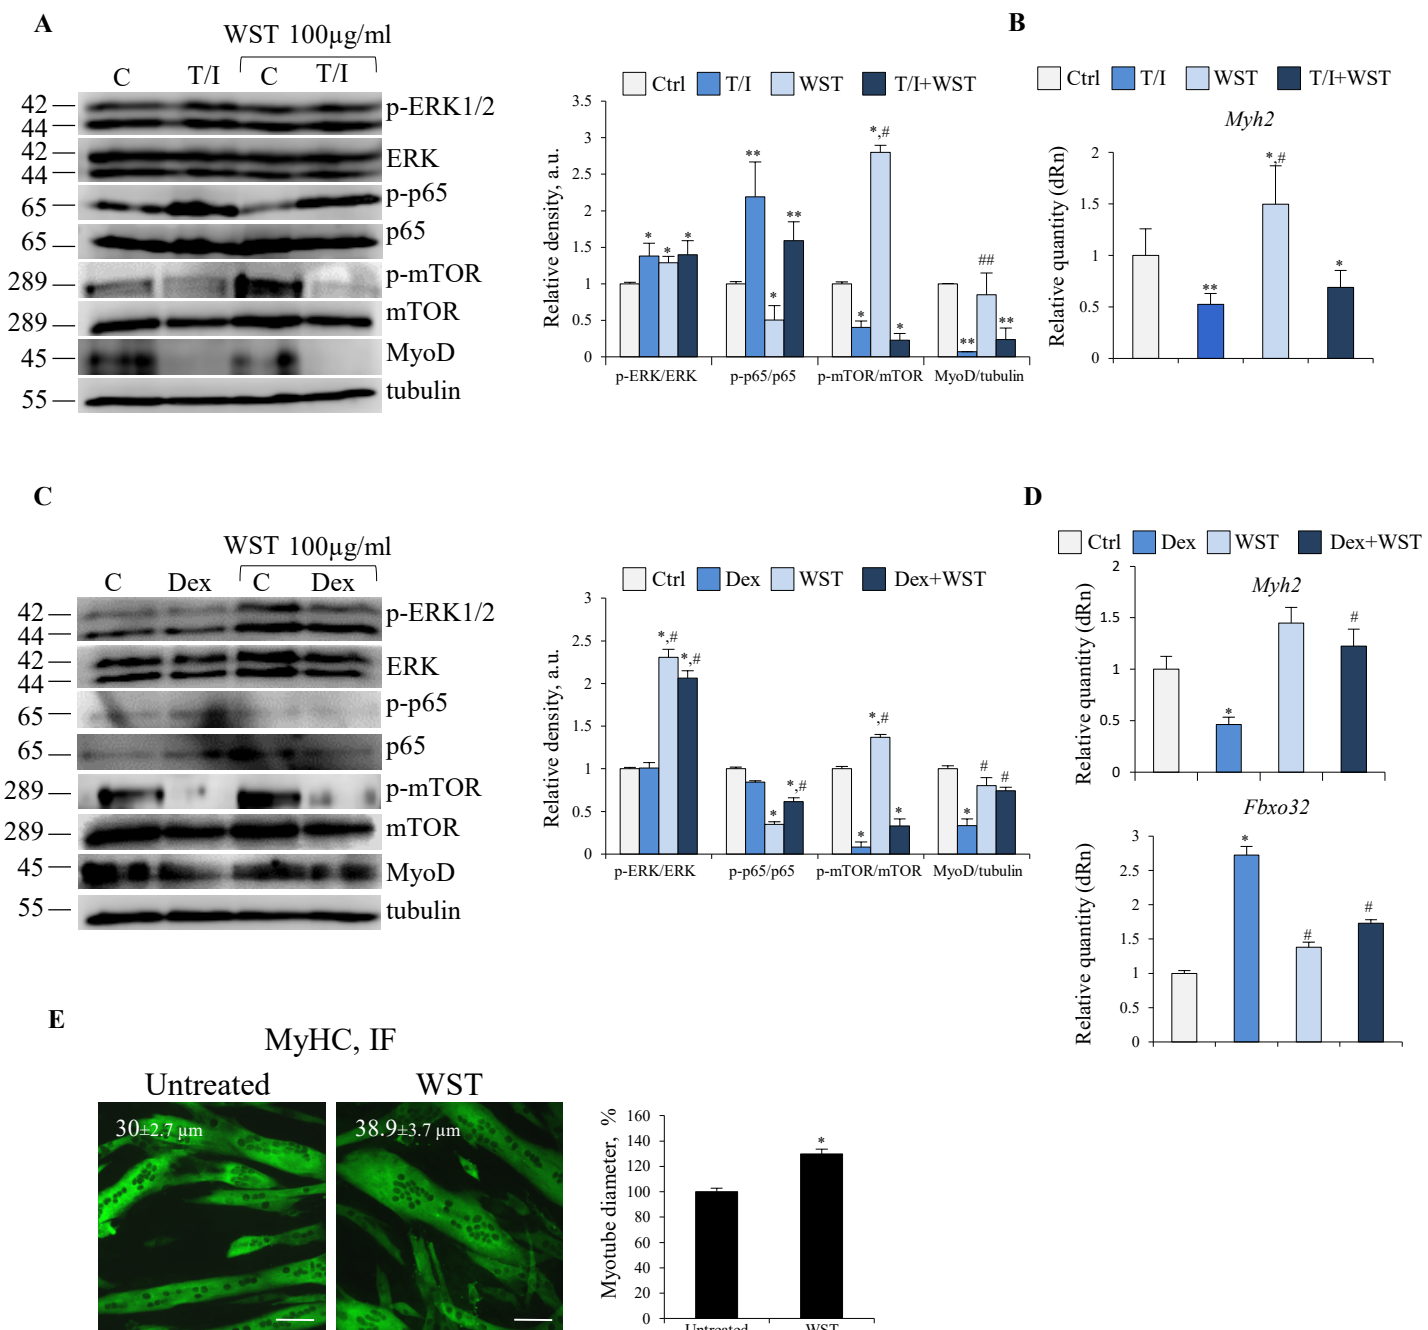

Supplementary Figure 6
